# Supplementary material
Source: PubMed Central journal article supplement (PMC4746094)

Supplemental Figures for:  
Ventricular-Arterial Coupling in Breast Cancer Patients Following Treatment with Anthracycline-Containing Adjuvant Chemotherapy  
Neil Eves et al.

**Figure S1 – Study Flow.**

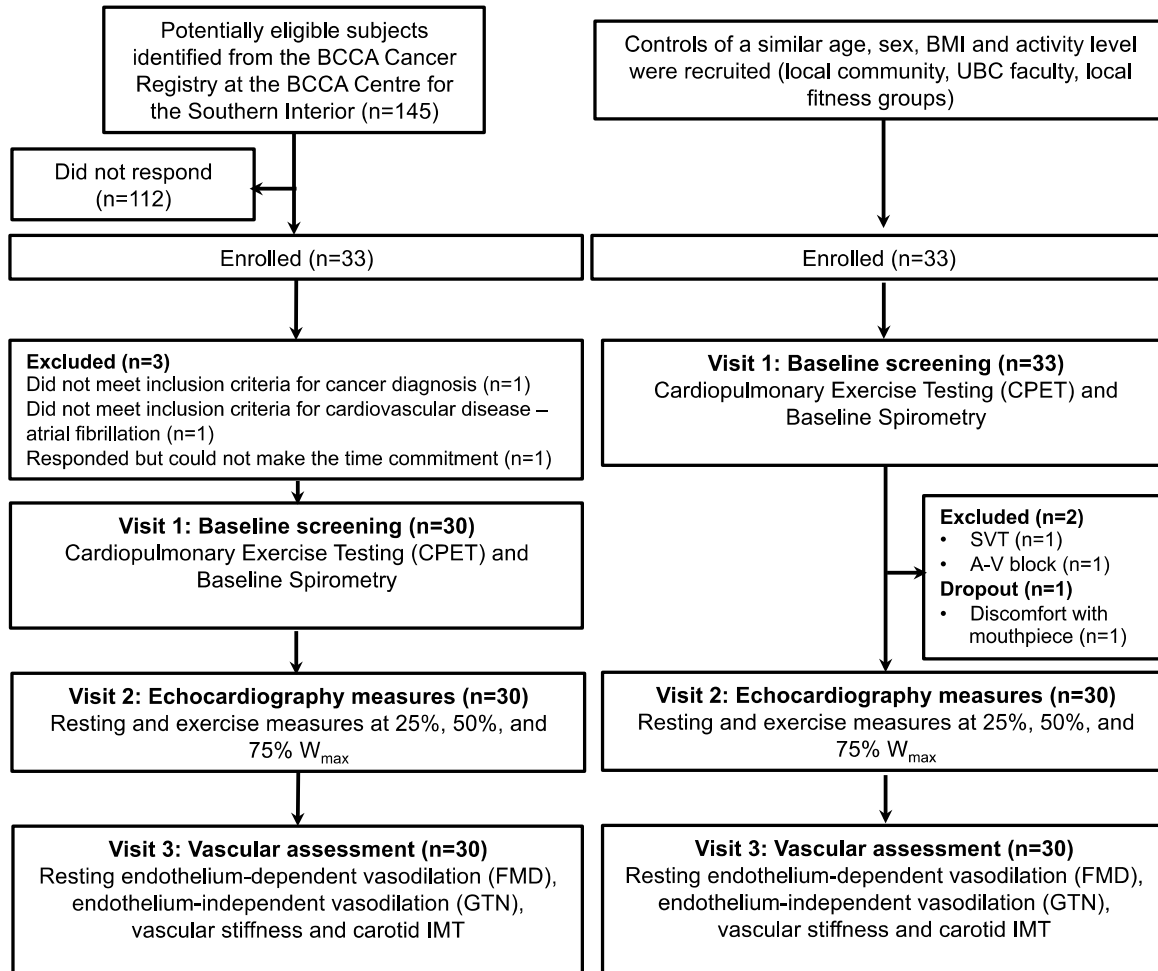

**Figure S2** – Individual change scores (%) for Ea/Ees from rest to 75%  $W_{max}$ . Each black line represents the individual response for each breast cancer survivor (n=30).

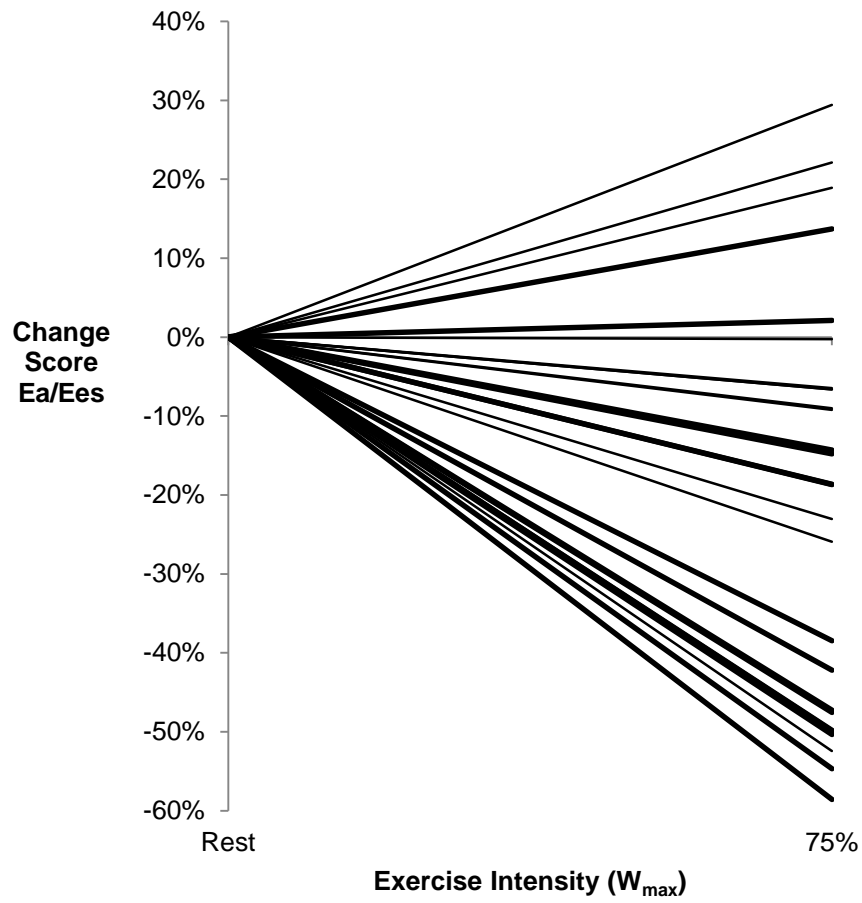

**Figure S3** – Change in: A) end systolic elastance (Ees), B) Ea/Ees, C) end systolic volume (ESV), end-diastolic volume (EDV), E) stroke volume (SV) and F) systolic blood pressure (SBP) from rest to exercise at 75%  $W_{max}$  in breast cancer survivors (Sur) compared to controls (Con) stratified into sub groups according to whether they had a large increase in Ea ( $\Delta Ea > 0.57$  mmHg/mL, n=11 Sur, n=9 Con); a small increase in Ea ( $0.03$  mmHg/mL  $< \Delta Ea < 0.57$  mmHg/mL, n=9 Sur, n=9 Con); or no change or a decrease in Ea ( $\Delta Ea < 0.03$  mmHg/mL, n=9 Sur, n=10 Con). Bars represent a significant difference ( $p < 0.05$ ) between subgroups.

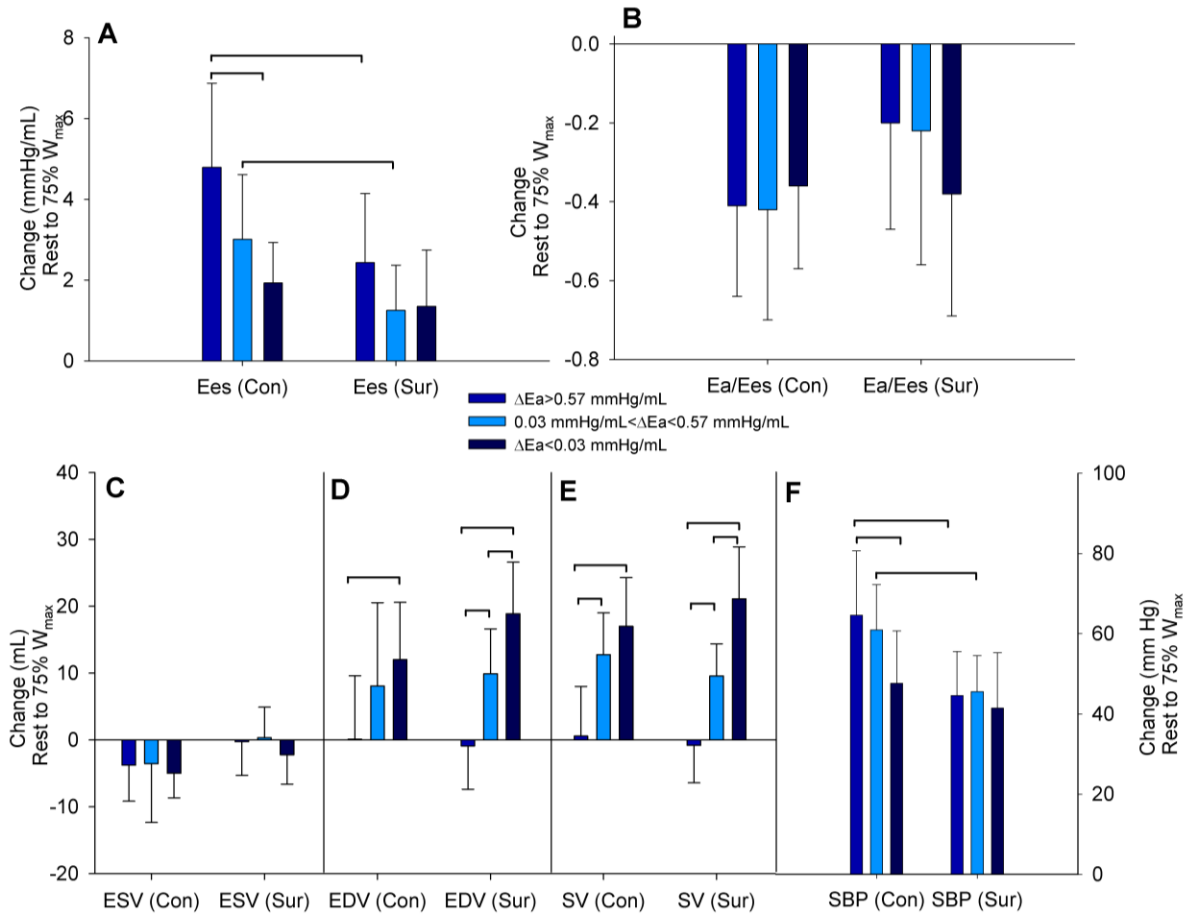

Supplement: supp_the2015-0352_Supplemental_Figures.pdf [file supp_the2015-0352_Supplemental_Figures.pdf]
